# Supplementary material for: Nanoparticles based on lipidyl-β-cyclodextrins: synthesis, characterization, and experimental and computational biophysical studies for encapsulation of atazanavir
Source: Royal Society of Chemistry journal article supplement (doi:10.1039/c8nj03237h), 2018-01-01
Supplement: c8nj03237h1.pdf [file c8nj03237h1.pdf]

## Supporting Information

Nanoparticles based on lipidyl- $\beta$ -cyclodextrins: synthesis, characterization and experimental and computational biophysical studies for encapsulation of atazanavir

Aurélien L. Furlan, Sébastien Buchoux, Yong Miao, Vincent Banchet, Mathieu Létévé, Virginie Lambertyn, Jean Michel, Véronique Bonnet,\* Catherine Sarazin

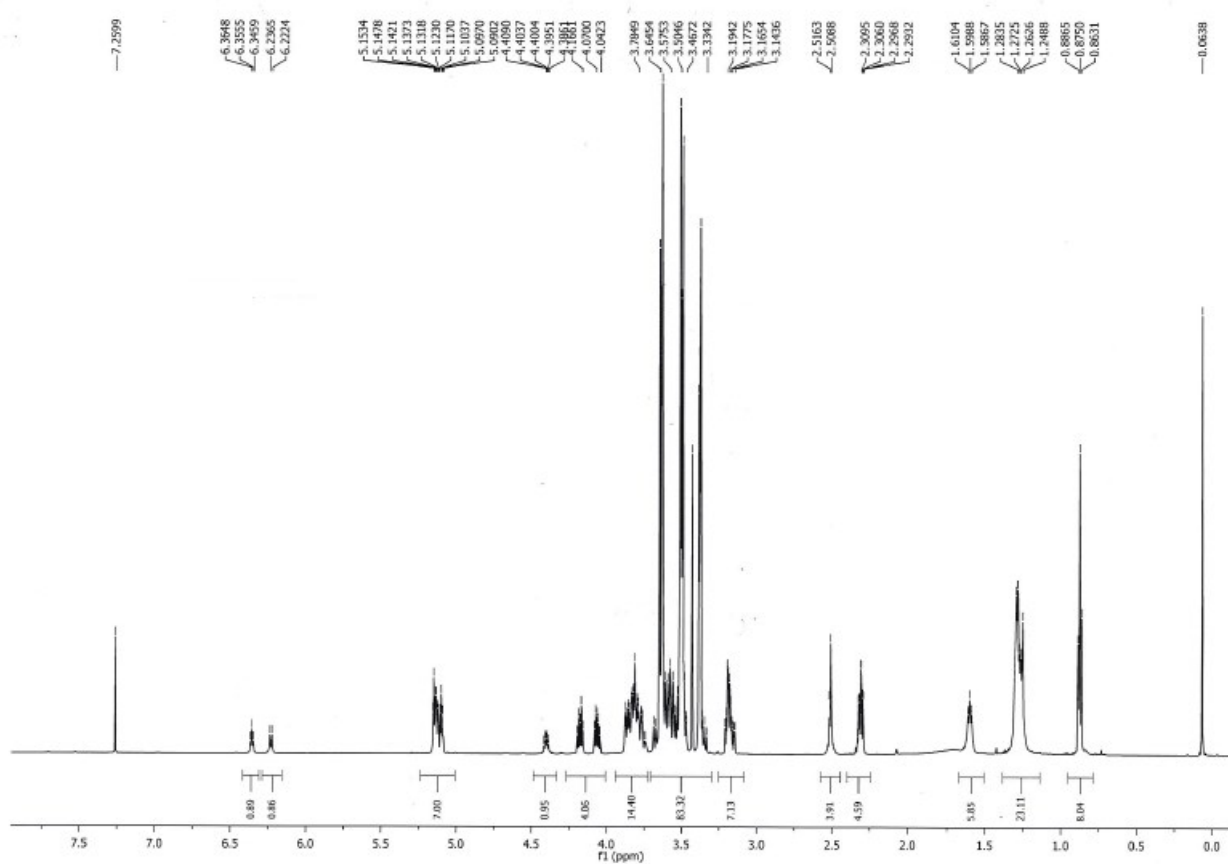

Fig S1 <sup>1</sup>H NMR of DCCD 600MHz in CDCl<sub>3</sub>

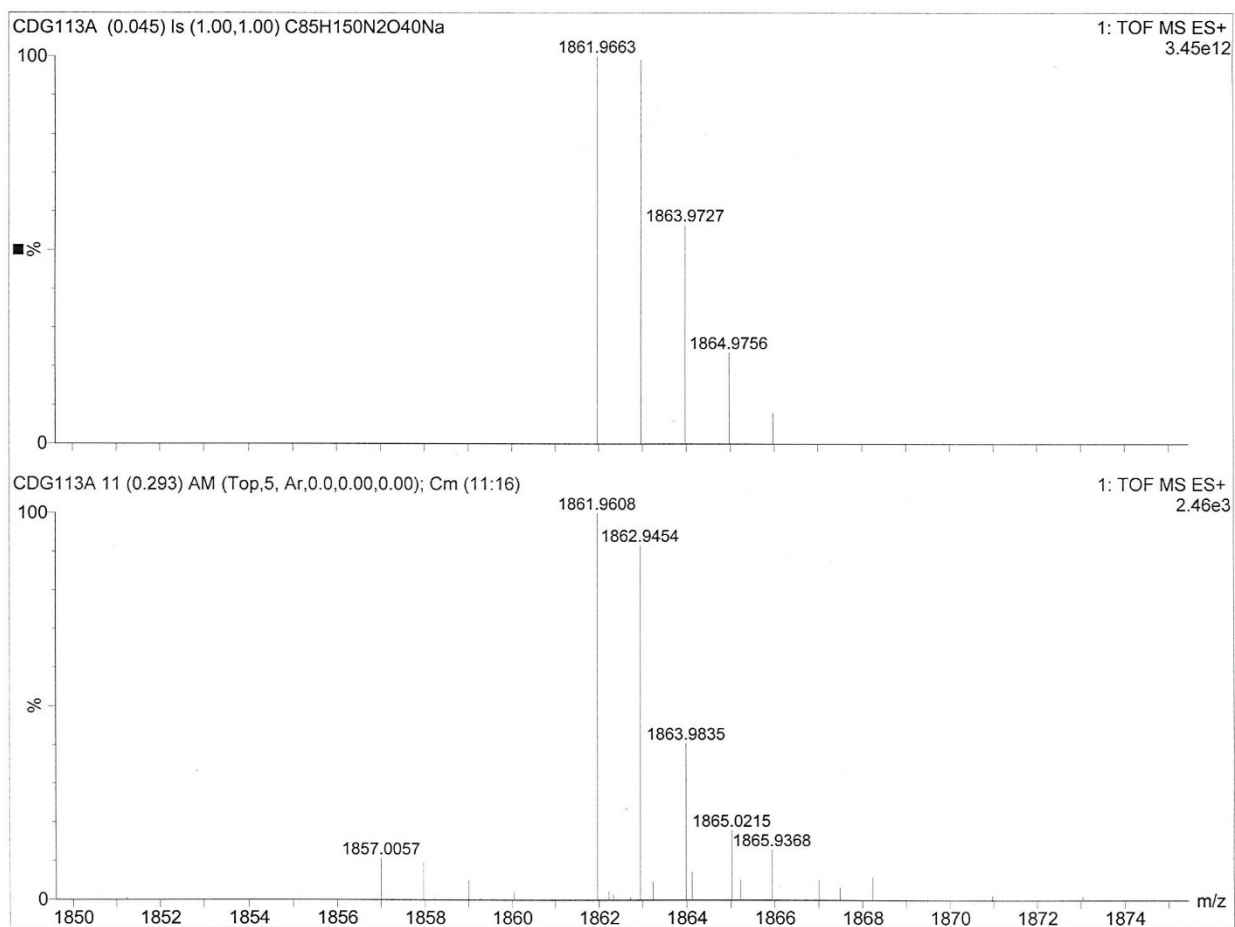

Fig S2 Isotopic pattern of  $[M+Na]^+$  of DCCD

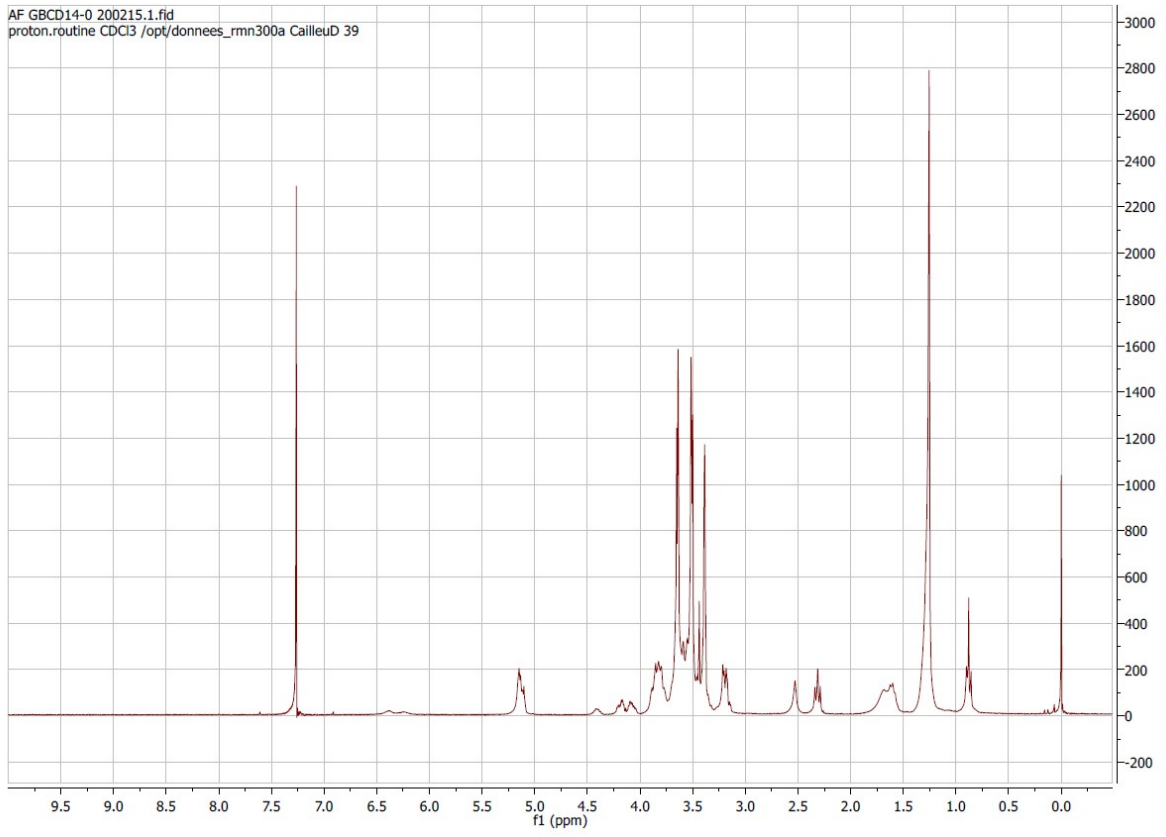

Fig S3 <sup>1</sup>H NMR of DMCD 300MHz in CDCl<sub>3</sub>

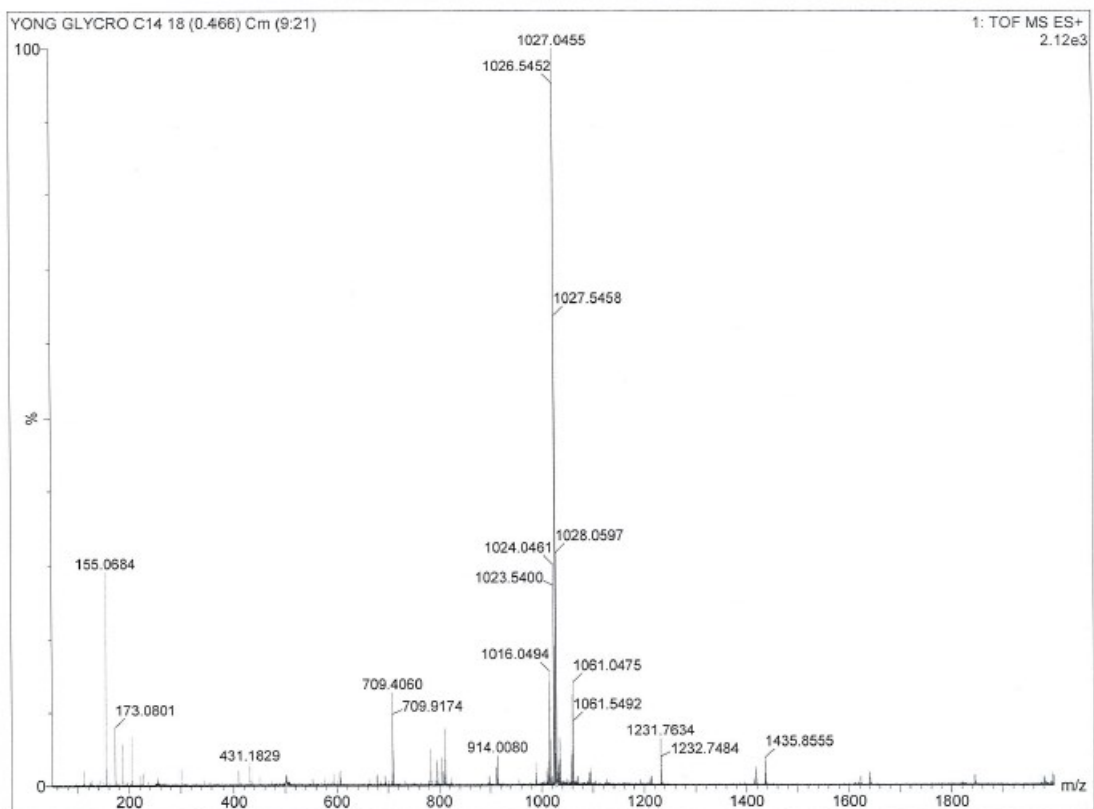

Fig S4 Mass spectra of DMCD (1027.0455 m/z of  $[M+2Na]^{2+}$ )

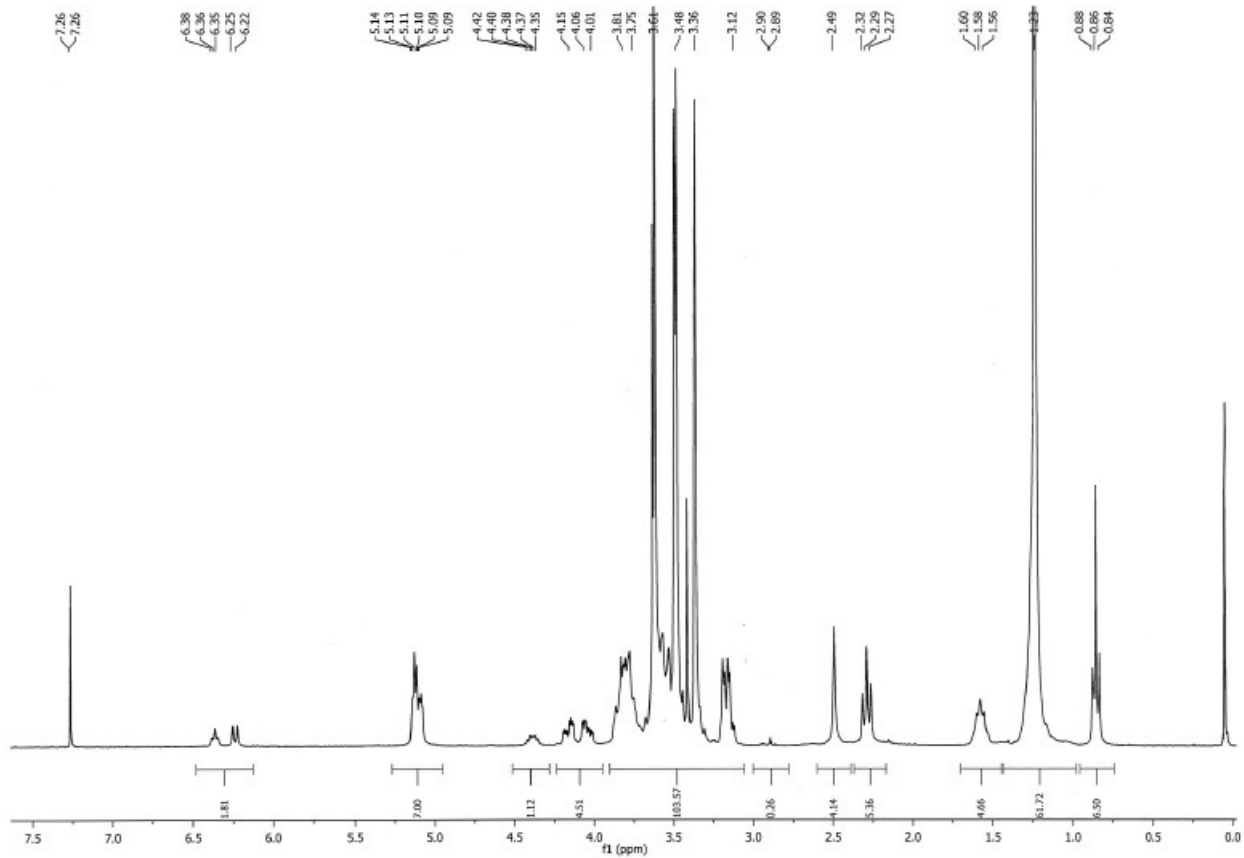

Fig S5  $^1\text{H}$  NMR of DSCD 600MHz in  $\text{CDCl}_3$

a)

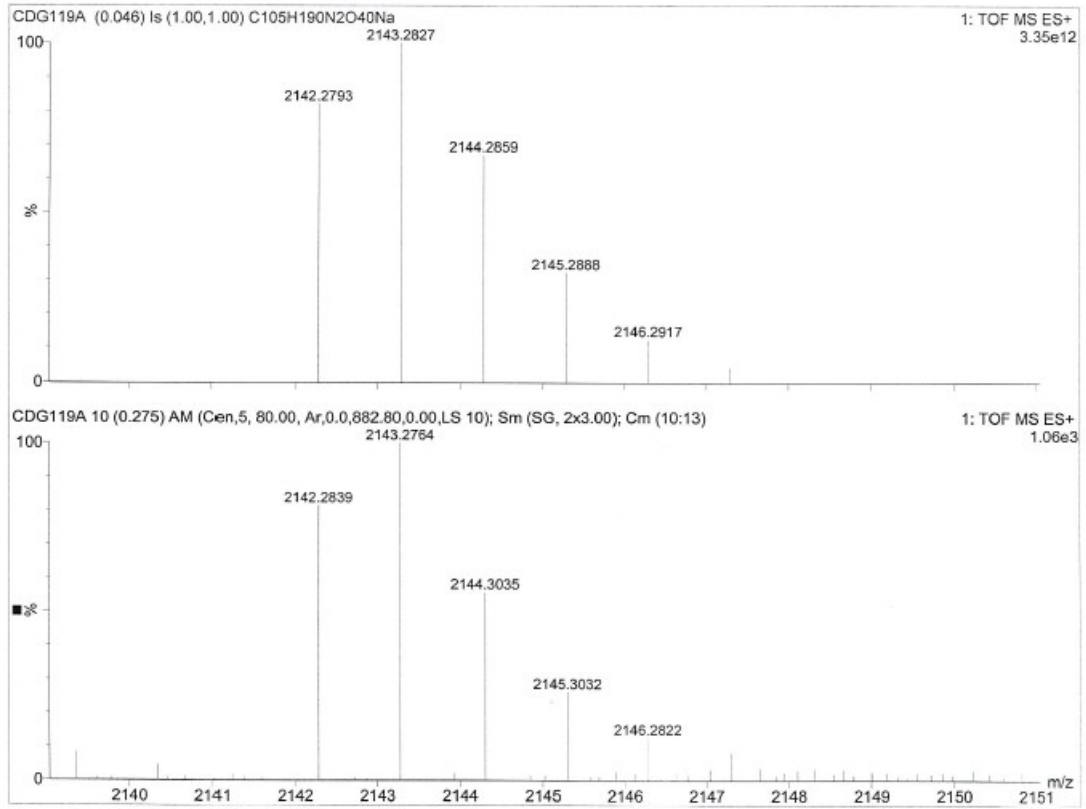

b)

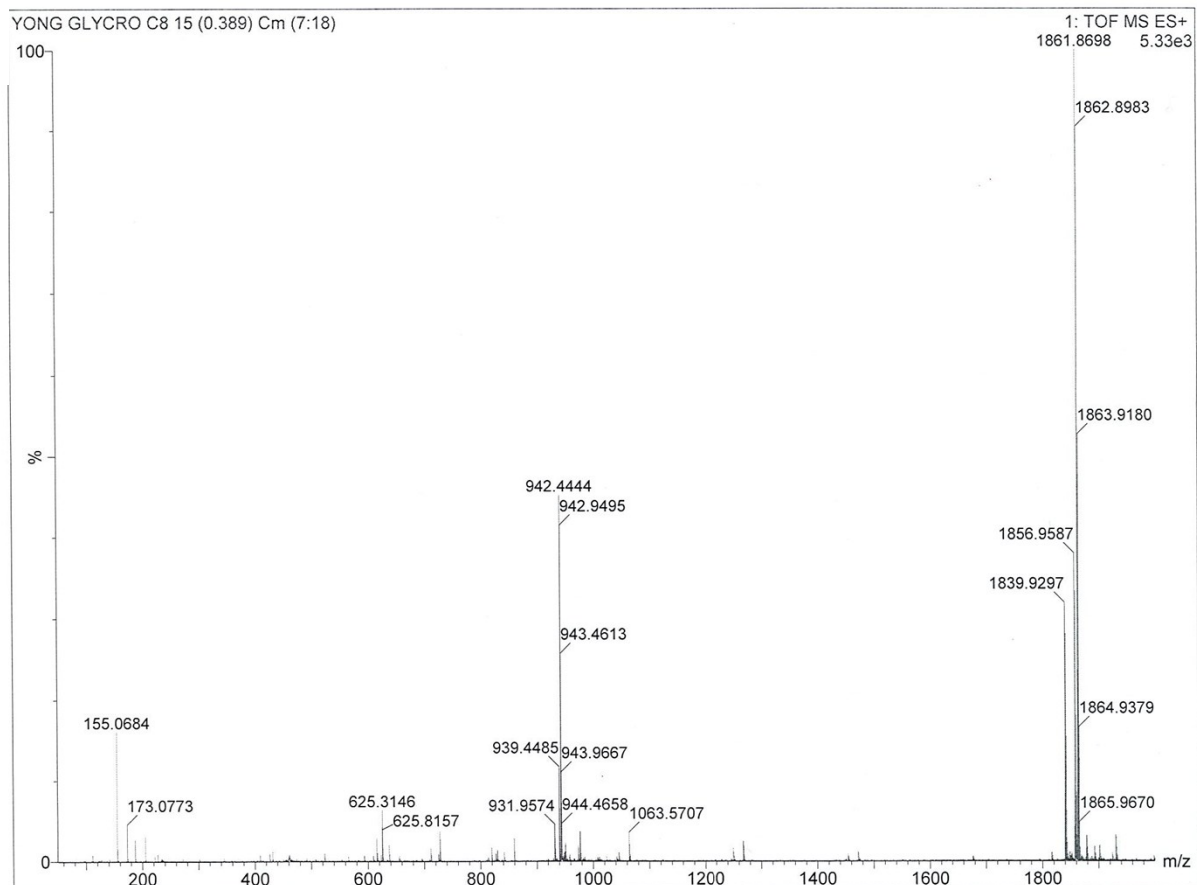

Fig S6 a) Isotopic pattern of  $[M+Na]^+$  of DSCD and b) Mass spectrum of DOCD

AF GBCD18-1 200215.1.fid  
proton.routine CDCl3 /opt/donnees\_rmn300a CailleuD 34

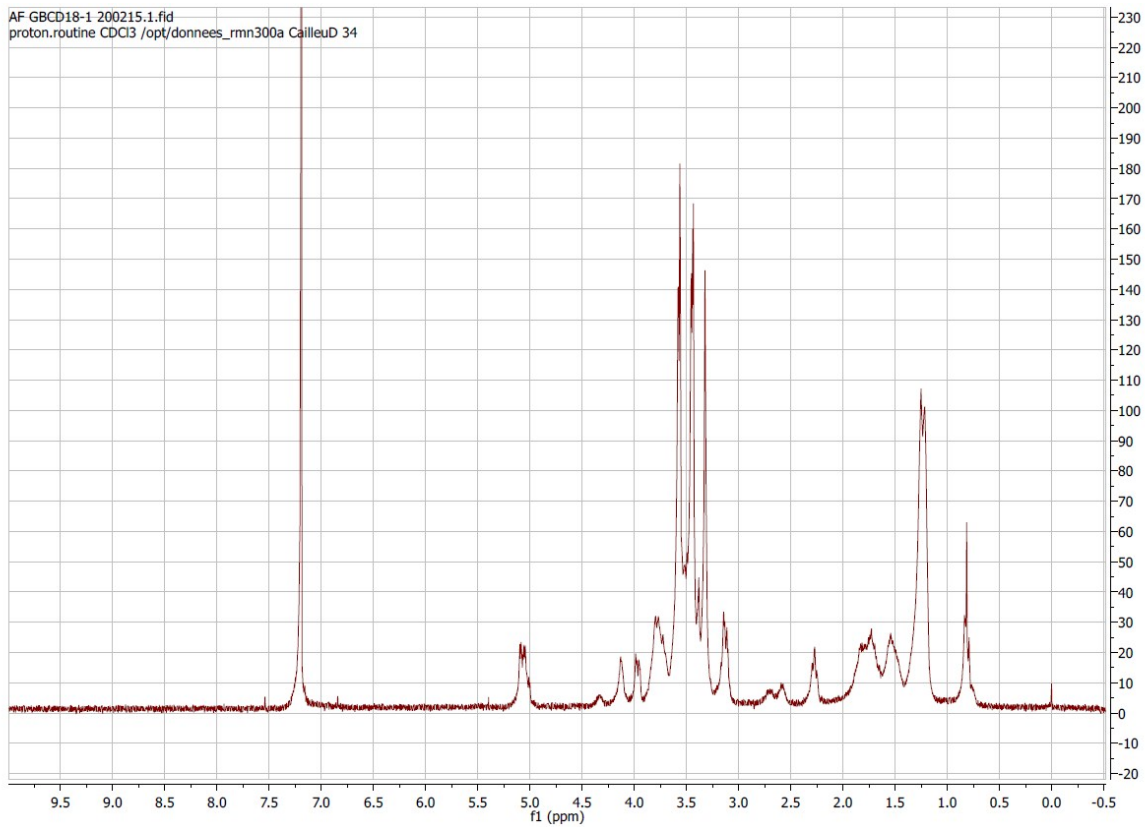

Fig S7 <sup>1</sup>H NMR of DOCD 300MHz in CDCl<sub>3</sub>



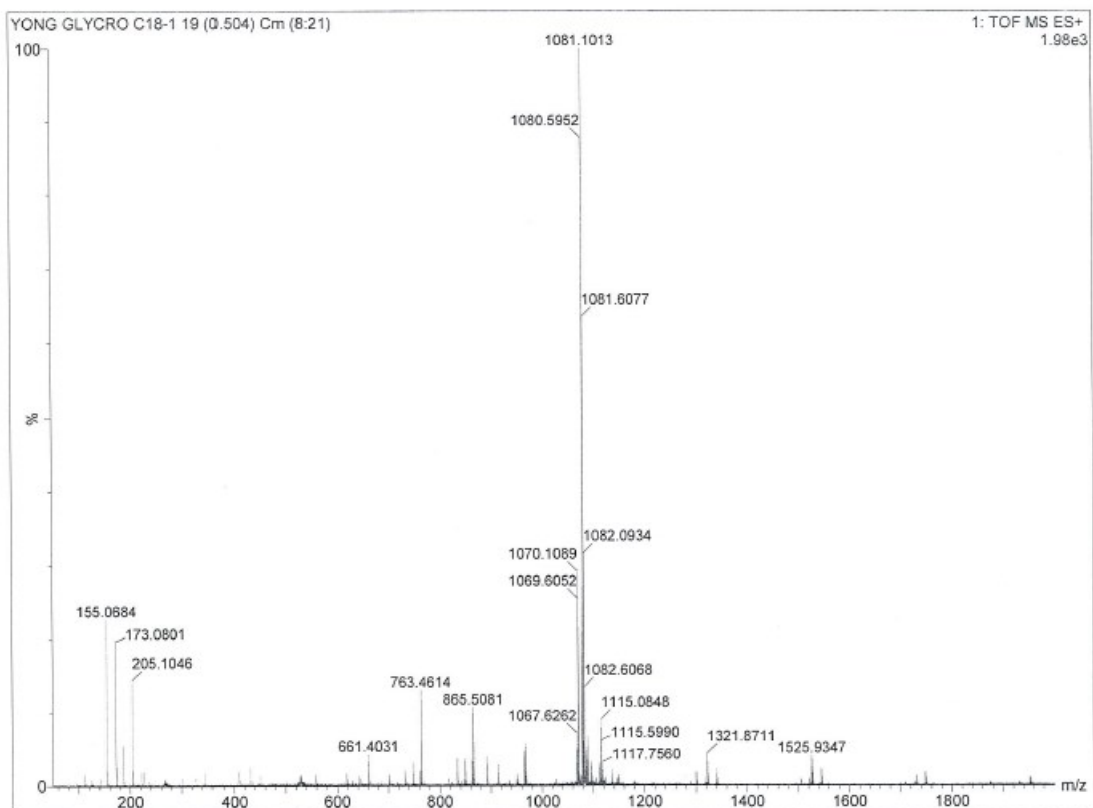

Fig S8 Mass spectrum of DOCD (1081.1013 m/z of  $[M+2Na]^{2+}$ )

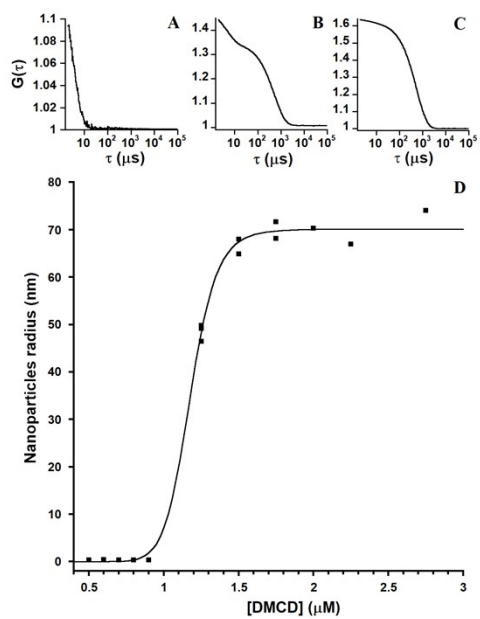

Figure S9: Autocorrelation functions of DMCD at 0.7 (A), 1.25 (B) and 2 mmol/L (C). (D) Variation of the nanoparticles radius for the same sample. These nanoparticles have been hydrated by a 5% glucose buffer solution.  $T = 25$  °C.

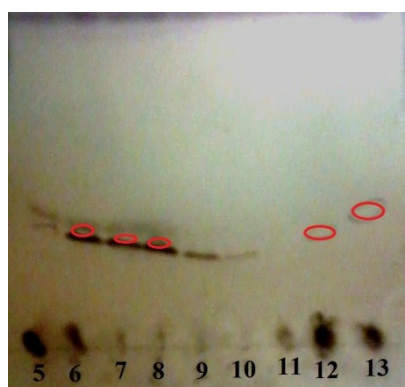

Figure S10 TLC ( $\text{CH}_2\text{Cl}_2/\text{MeOH}$  95:5) of fractions 5-13 of size exclusion chromatography of NPs prepared in pure water mixing DSCD and ATAZ. (Red: UV 254nm, Black: Vanillin/ $\text{H}_2\text{SO}_4$  followed by heating) : fractions 6-8 = NPs containing ATAZ encapsulated, fractions 9-10: free CDs, fractions 12-13: free ATAZ.

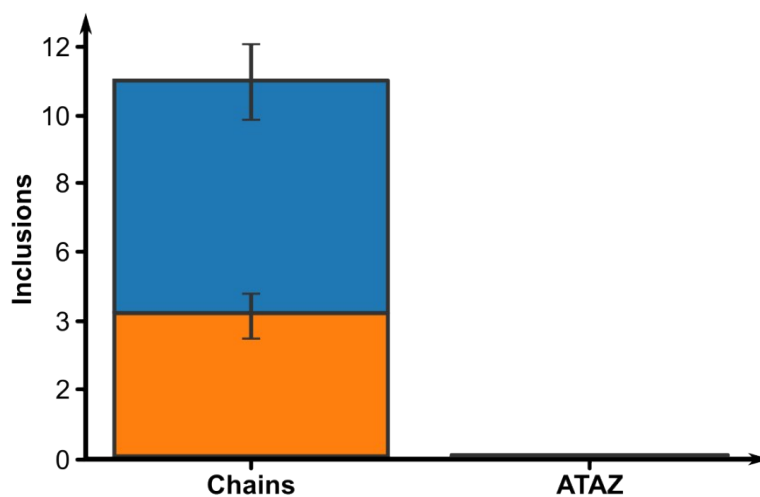

Figure S11: Average number of moieties included inside DOCD hydrophobic cavities. Left bar represents the inclusions of lipids chains from either the same DOCD (ie “self-inclusion”, orange) or from other DOCD molecules (blue). Right bar represents the inclusions of ATAZ molecules. An inclusion is considered when the moiety stays at least 0.4 ns inside the hydrophobic cavity. The last 100 ns of the DOCD36/ATAZ18 simulation were used for averaging, allowing computation of standard deviations (represented by error bars). As no ATAZ inclusion was observed, the corresponding standard deviation is 0 (hence no visible error bar).
